# Supplementary material
Source: Springer Nature journal article supplement (https://www.springermedizin.de/resource/supplementary/12885_2006_564_MOESM5_ESM.pdf/9469784)

1      2      3      4      5      6      7      8  
U M   U M   U M   U M   U M   U M   U M   U M

A

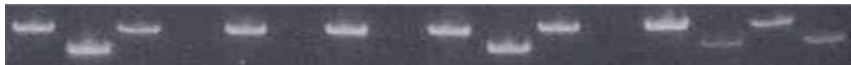

B

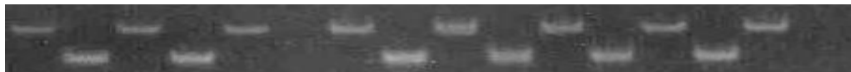

C

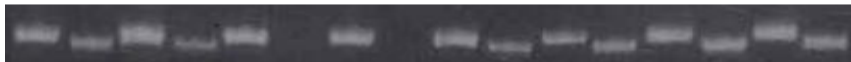

D

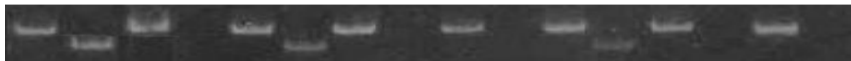

E

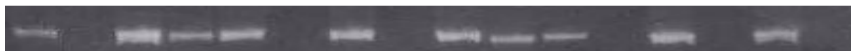

F

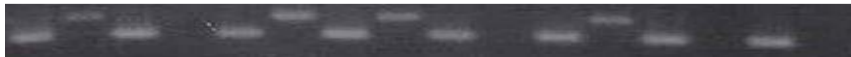

Supplement: MOESM5 [file 9469784]
